# Supplementary material for: A hippocampal astrocytic sequence emerges during learning and memory
Source: Research Square preprint supplement (doi:10.21203/rs.3.rs-5046113/v1), 2024-10-24
Supplement: Supplementary file 1 [file 3884834ef98cc2b63c53df1e.xlsx]

## Sheet: Figure 1
Figure	Test/Model	Measure	Details	Data Removed	DF1	DF2	F-Value	T-Statistic	p-Value	Sig
1D	2WAY-RM-ANOVA	Interaction	Day x Group	none	1	5	21.68		0.0056	Y
	2WAY-RM-ANOVA	Main Effect	Day	none	1	5	2.232		0.1954	N
	2WAY-RM-ANOVA	Main Effect	Group	none	1	5	10.17		0.0243	Y
	2WAY-RM-ANOVA	Main Effect	Subject	none	5	5	2.269		0.1948	N
	Sidaks	Post-Hoc	Day 1 (Cxt A vs Cxt B)	none					0.996	N
	Sidaks	Post-Hoc	Day 2 (Cxt A vs Cxt B)	none					0.0008	Y
1G	2WAY-RM-ANOVA	Interaction	Day x Group	none	1	5	0.8621		0.3958	N
	2WAY-RM-ANOVA	Main Effect	Day	none	1	5	3.106		0.1383	N
	2WAY-RM-ANOVA	Main Effect	Group	none	1	5	0.01765		0.8995	N
	2WAY-RM-ANOVA	Main Effect	Subject	none	5	5	6.41		0.0312	Y
1H	Independent T-Test		Reactivated Cells (Cxta A vs. Cxt B)	none				0.1211	0.9083	N

## Sheet: Figure 2
Figure	Test/Model	Measure	Details	Data removed	T-Statistic	p-Value	Sig	Parameters
2B	95% tCI	Context A	Calcium signal above mean-shifted baseline (>1.0 second)	none		<0.05	Y
	95% tCI	Context B	Calcium signal above mean-shifted baseline (> 1.0 second)	none		<0.05	Y
2D	Spearman's Correlation	Astro4	Odd Sort on Odd vs. Odd Sort on Even Peaks (FC)	none		0	Y	rho=0.566
2E	One-Sample T-Test		Rho vs. zero (0)	none	13.1931	1.17E-05	Y
2F	Linear regression (OLS)	Astro4	Odd Sort on Odd vs. Odd Sort on Even Peaks (FC)	none		see parameters	Y	Slope=0.256; Intercept=2.71; p_value_slope=0.000017; p_value_bias=3.73E-21; r_squared=0.065
2G	Hierarchical Bayesian Model	All mice (FC)		none				Peak distribution = 4.7s; interquartile= 3.5 to 7.2s; 90th percentile = 16.4s
2H	Exponential	All mice (FC)	Fit distribution to estimated peak locations (mu)	eliminated peaks <2s after foot shock (1.7% cells)				WAIC=8837; SE=71; beta = 0.14
	LogNormal	All mice (FC)	Fit distribution to estimated peak locations (mu)	eliminated peaks <2s after foot shock (1.7% cells)				WAIC=8015; SE=103; mu=1.71; sigma=0.65
	Normal (Gaussian)	All mice (FC)	Fit distribution to estimated peak locations (mu)	eliminated peaks <2s after foot shock (1.7% cells)				WAIC=9854; SE=109; mu=7.12; sigma=6.58
	PowerLaw	All mice (FC)	Fit distribution to estimated peak locations (mu)	eliminated peaks <2s after foot shock (1.7% cells)				WAIC=7879; SE=84; alpha=1.69
	K-S Test (Power-Law)	All mice (FC)	Fit of the best distribution to the peak locations (mu)	eliminated peaks <2s after foot shock (1.7% cells)		<0.001	Y	KS distance = 0.46
2I	Linear mixed effects model	All mice (FC)	Estimated peak width (sigma) as a function of peak location (mu)	eliminated peaks <2s after foot shock (1.7% cells)		2.49E10-306	Y	Slope = 0.364

## Sheet: Figure 3
Figure	Test/Model	Measure	Details	Data removed	T-Statistic	p-Value	Sig	Rho	Parameters
3G	Independent T-Test		Rho Cxt A vs Rho Cxt B	none	5.44646	0.002834	Y
3H	Spearman's Correlation	Astro4	Odd Sort Odd vs. Odd Sort Even Peaks	none		2.82519e-12	Y	0.389
3I	Spearman's Correlation	Astro7	Odd Sort Odd vs. Odd Sort Even Peaks	none		0.398651	N	0.071
3J	Hierarchical Bayesian Model	Context A							Peak distribution median=7.7s; Interquartile range=5.11 to 11.15s; 90th percentile=15.3s
	Hierarchical Bayesian Model	Context B							Peak distribution median=11.55s; Interquartile range=7.44 to 15.82s; 90th percentile=19.3s
3K	Exponential	Context A	Fit distribution to estimated peak locations (mu)	eliminated peaks <2s after detected event					WAIC=4811; se=30; beta=0.11
	LogNormal		Fit distribution to estimated peak locations (mu)	eliminated peaks <2s after detected event					WAIC=4318; se=42; mu=2.03; sigma=0.55
	Normal (Gaussian)		Fit distribution to estimated peak locations (mu)	eliminated peaks <2s after detected event					WAIC=4517; se=50; mu=8.82; sigma=4.78
	PowerLaw		Fit distribution to estimated peak locations (mu)	eliminated peaks <2s after detected event					WAIC=4560; se=30; alpha=0.98
	K-S Test		Fit of the best distribution to the peak locations (mu)
3L	Exponential	Context B	Fit distribution to estimated peak locations (mu)	eliminated peaks <2s after detected event					WAIC=3548; se=19; beta=0.08
	LogNormal		Fit distribution to estimated peak locations (mu)	eliminated peaks <2s after detected event					WAIC=3332; se=45; sigma=0.60
	Normal (Gaussian)		Fit distribution to estimated peak locations (mu)	eliminated peaks <2s after detected event					WAIC=3101; se=30; mu=12.58; sigma=5.31
	PowerLaw		Fit distribution to estimated peak locations (mu)	eliminated peaks <2s after detected event					WAIC=3292; se=0.4; alpha=0.02
	K-S Test		Fit of the best distribution to the peak locations (mu)	eliminated peaks <2s after detected event
3M	Independent T-Test	Context A vs. B	Sequence variability during recall session	none	5.87	0.025	Y

## Sheet: Figure 4
Figure	Test/Model	Measure	Details	Data removed	Rho	T-Statistic	p-Value	Sig
4B	Paired T-Test	Context A	Freezing Within Sequence Vs. Freezing Outside Sequence	did not include Cxt B mice; did not freeze during Recall		-3.25468	0.0473217	Y
4C	Independent T-Test		Rho Cxt A vs Rho Cxt B	removed Astro9, only had 6 reactivated cells		6.37372	0.003107	Y
4D	Spearman's Correlation	Astro5	FC Sort on FC vs. Recall Sort on FC	none	0.2828		0.00049	Y
		Astro7	FC Sort on FC vs. Recall Sort on FC	none	0.0835		0.4387	N

## Sheet: Supp 1
Figure	Test/Model	Measure	Effect	Data Removed	DF1	DF2	F-Value	T-Statistic	p-Value	Sig
Supp 1A	Mixed-effects model (REML)	Interaction	Time x Group (FC)	none	5	12	0.04285		0.1948	N
	Mixed-effects model (REML)	Main effect	Time	none	5	18	7.242		0.0007	Y
	Mixed-effects model (REML)	Main effect	Group	none	1	5	0.008831		0.09267	N
	Sidak's	Post-Hoc	Cxt A: 0 vs. 300 seconds	none					0.0067	Y
			Cxt A: 60 vs. 300 seconds	none					5.70E-03	Y
			Cxt A: 120 vs. 300 seconds	none					0.0215	Y
			Cxt B: 0 vs. 300 seconds	none					1.45E-02	Y
			Cxt B: 60 vs. 300 seconds	none					0.0148	Y
Supp 1B	Two-way RM ANOVA	Interaction	Time x Group (Recall)	none	5	25	0.5339		0.7485	N
		Main effect	Time	none	5	25	1.478		0.2324	N
		Main effect	Group	none	1	5	25.76		0.0039	Y
		Main effect	Subject	none	5	25	1.742		0.1618	N
	Sidak's	Post-Hoc	Cxt A vs B: 180 seconds	none					0.0109	Y
			Cxt A vs B: 240 seconds	none					0.0144	Y

## Sheet: Supp 2
Figure	Test/Model	Measure	Details	Data Removed	Parameters
Supp 2	WaveMAP (FC)	All mice (FC)	Single astrocyte average shock response; -7.5 to 15s around each foot shock (z-scored)	none	n_neighbors=10; mindistance=0.1

## Sheet: Supp3
Figure	Animal	Test/Model	Measure	Data Removed	Rho	p-Value	Sig	OLS model results
Supp 3A	Astro3	Spearman's Correlation	Odd Sort Odd vs. Odd Sort Even Peaks (FC)	none	0.506	4.0989e-12	Y
		Linear Regression	Odd Sort Odd vs. Odd Sort Even Peaks (FC)	none			Y	slope=0.305022,intercept=3.211705,p_value_slope=0.000068,p_value_bias=2.873216e-12,r_squared0.093039
Supp 3B	Astro4	Spearman's Correlation	Odd Sort Odd vs. Odd Sort Even Peaks (FC)	none	0.556	0	Y
		Linear Regression	Odd Sort Odd vs. Odd Sort Even Peaks (FC)	none			Y	slope=0.256012,intercept=2.718286,p_value_slope=0.000017,p_value_bias=3.731148e-21,r_squared=0.065542
Supp 3C	Astro5	Spearman's Correlation	Odd Sort Odd vs. Odd Sort Even Peaks (FC)	none	0.486	1.48e-18	Y
		Linear Regression	Odd Sort Odd vs. Odd Sort Even Peaks (FC)	none			Y	slope=0.274262,intercept=3.0627,p_value_slope=0.000002,p_value_bias=2.124693e-23,r_squared=0.07522
Supp 3D	Astro6	Spearman's Correlation	Odd Sort Odd vs. Odd Sort Even Peaks (FC)	none	0.667	0	Y
		Linear Regression	Odd Sort Odd vs. Odd Sort Even Peaks (FC)	none			Y	slope=0.608745,intercept=2.531721,p_value_slope=2.506922e-19,p_value_bias=0.000004,r_squared=0.370571
Supp 3E	Astro7	Spearman's Correlation	Odd Sort Odd vs. Odd Sort Even Peaks (FC)	none	0.412	7.95743e-12	Y
		Linear Regression	Odd Sort Odd vs. Odd Sort Even Peaks (FC)	none			Y	slope=0.401706,intercept=4.137215,p_value_slope=3.144193e-11,p_value_bias=1.476287e-15,r_squared=0.161367
Supp 3F	Astro8	Spearman's Correlation	Odd Sort Odd vs. Odd Sort Even Peaks (FC)	none	0.706	0	Y
		Linear Regression	Odd Sort Odd vs. Odd Sort Even Peaks (FC)	none			Y	slope=0.524961,intercept=2.071781,p_value_slope=2.499616e-18,p_value_bias=2.155988e-13,r_squared=0.275585
Supp 3G	Astro9	Spearman's Correlation	Odd Sort Odd vs. Odd Sort Even Peaks (FC)	none	0.701	2.53e-18	Y
		Linear Regression	Odd Sort Odd vs. Odd Sort Even Peaks (FC)	none			Y	slope=0.7298,intercept=0.763625,p_value_slope=2.212930e-20,p_value_bias=0.000114,r_squared=0.532608

## Sheet: Supp 4
Figure	Animal	Test/Model	Measure	Data Removed	slope	intercept	p_value_slope	p_value_bias	r_squared	Sig
Supp 4A	Astro3	Linear Regression	Peaks vs Widths (FC)	none	0.327771	-0.308617	5.480914740380108e-40	0.0324321		Y
Supp 4B	Astro4	Linear Regression	Peaks vs Widths (FC)	none	0.40626485808237733	-0.587442	3.5182509238418832e-40	0.0536774		Y
Supp 4C	Astro5	Linear Regression	Peaks vs Widths (FC)	none	0.6227550953695673	-1.94388	2.833888321120556e-71	1.0651684771093885e-19		Y
Supp 4D	Astro6	Linear Regression	Peaks vs Widths (FC)	none	0.24634567834641719	0.13258731316207129	5.918525337265739e-21	0.15113441148661028		Y
Supp 4E	Astro7	Linear Regression	Peaks vs Widths (FC)	none	0.535482	-1.09782	5.2824869088913145e-61	3.106179043074649e-06		Y
Supp 4F	Astro8	Linear Regression	Peaks vs Widths (FC)	none	0.16207742146285578	0.5223792124123601	1.6539724756791494e-23	0.00260904		Y
Supp 4G	Astro9	Linear Regression	Peaks vs Widths (FC)	none	0.3672540162445056	-0.591816	2.6042069466464743e-27	0.0668806		Y

## Sheet: Supp 5 
Figure	Animal	Test/Model	Measure	Data Removed	Rho	p-Value	Sig	OLS model results (slope, intercept, p_value_slope, p_value_bias, r_squared)
Supp 5A	Astro3	Spearman's Correlation	Odd Sort Odd vs. Odd Sort Even Peaks (Recall)	none	0.263	0.000178729	Y
		Linear Regression	Odd Sort Odd vs. Odd Sort Even Peaks (Recall)	none			Y	slope=0.195191,intercept=4.089729,p_value_slope=0.005731,p_value_bias=4.800763e-13,r_squared=0.038099
Supp 5B	Astro4	Spearman's Correlation	Odd Sort Odd vs. Odd Sort Even Peaks (Recall)	none	0.389	2.82519e-12	Y
		Linear Regression	Odd Sort Odd vs. Odd Sort Even Peaks (Recall)	none			Y	slope=0.22729,intercept=4.246363,p_value_slope=0.000071,p_value_bias=5.508908e-22,r_squared=0.051661
Supp 5C	Astro5	Spearman's Correlation	Odd Sort Odd vs. Odd Sort Even Peaks (Recall)	none	0.219	0.001842	Y
		Linear Regression	Odd Sort Odd vs. Odd Sort Even Peaks (Recall)	none			N	slope=0.093655,intercept=3.687482,p_value_slope=0.187141,p_value_bias=6.999805e-17,r_squared=0.008771
Supp 5D	Astro6	Spearman's Correlation	Odd Sort Odd vs. Odd Sort Even Peaks (Recall)	none	-0.051	0.556396	N
		Linear Regression	Odd Sort Odd vs. Odd Sort Even Peaks (Recall)	none			N	slope=-0.03104,intercept=5.568307,p_value_slope=0.721815,p_value_bias=6.253227e-07,r_squared=0.000963
Supp 5E	Astro7	Spearman's Correlation	Odd Sort Odd vs. Odd Sort Even Peaks (Recall)	none	0.071	0.398651	N
		Linear Regression	Odd Sort Odd vs. Odd Sort Even Peaks (Recall)	none			N	slope=0.010533,intercept=5.317302,p_value_slope=0.900286,p_value_bias=0.000001,r_squared=0.000111
Supp 5F	Astro8	Spearman's Correlation	Odd Sort Odd vs. Odd Sort Even Peaks (Recall)	none	-0.068	0.308062	N
		Linear Regression	Odd Sort Odd vs. Odd Sort Even Peaks (Recall)	none			N	slope=-0.085876,intercept=6.378162,p_value_slope=0.197368,p_value_bias=1.017400e-12,r_squared=0.007375
Supp 5G	Astro9	Spearman's Correlation	Odd Sort Odd vs. Odd Sort Even Peaks (Recall)	none	0.289	0.00961807	Y
		Linear Regression	Odd Sort Odd vs. Odd Sort Even Peaks (Recall)	none			N	slope=0.078443,intercept=2.867543,p_value_slope=0.49198,p_value_bias=0.000002,r_squared=0.006153

## Sheet: Supp 10
Figure	Animal	Test/Model	Measure	Rho	p-Value	Sig
Supp 10A	Astro3	Spearman's Correlation	FC Sort FC vs. Recall Sort FC (Reactivated Cells)	0.354	0.00043	Y
Supp 10B	Astro4	Spearman's Correlation	FC Sort FC vs. Recall Sort FC (Reactivated Cells)	0.307	0.00069	Y
Supp 10C	Astro5	Spearman's Correlation	FC Sort FC vs. Recall Sort FC (Reactivated Cells)	0.283	0.00049	Y
Supp 10D	Astro6	Spearman's Correlation	FC Sort FC vs. Recall Sort FC (Reactivated Cells)	0.011	0.9275	N
Supp 10E	Astro7	Spearman's Correlation	FC Sort FC vs. Recall Sort FC (Reactivated Cells)	0.084	0.4387	N
Supp 10F	Astro8	Spearman's Correlation	FC Sort FC vs. Recall Sort FC (Reactivated Cells)	0.119	0.2706	N
Supp 10G	Astro9	Spearman's Correlation	FC Sort FC vs. Recall Sort FC (Reactivated Cells)	-0.143	0.7871	N

[truncated: 1 more sheets: Tracked Cells]
